# Supplementary material for: Treatment response lowers tumor symptom burden in recurrent and/or metastatic head and neck cancer
Source: Springer Nature journal article supplement (doi:10.1186/s12885-020-07440-w), 2020-09-29
Supplement: MOESM2 [file 12885_2020_7440_MOESM2_ESM.pdf]

**Supplementary Figure S2:**

**Baseline symptoms in patients without and with distant metastases**

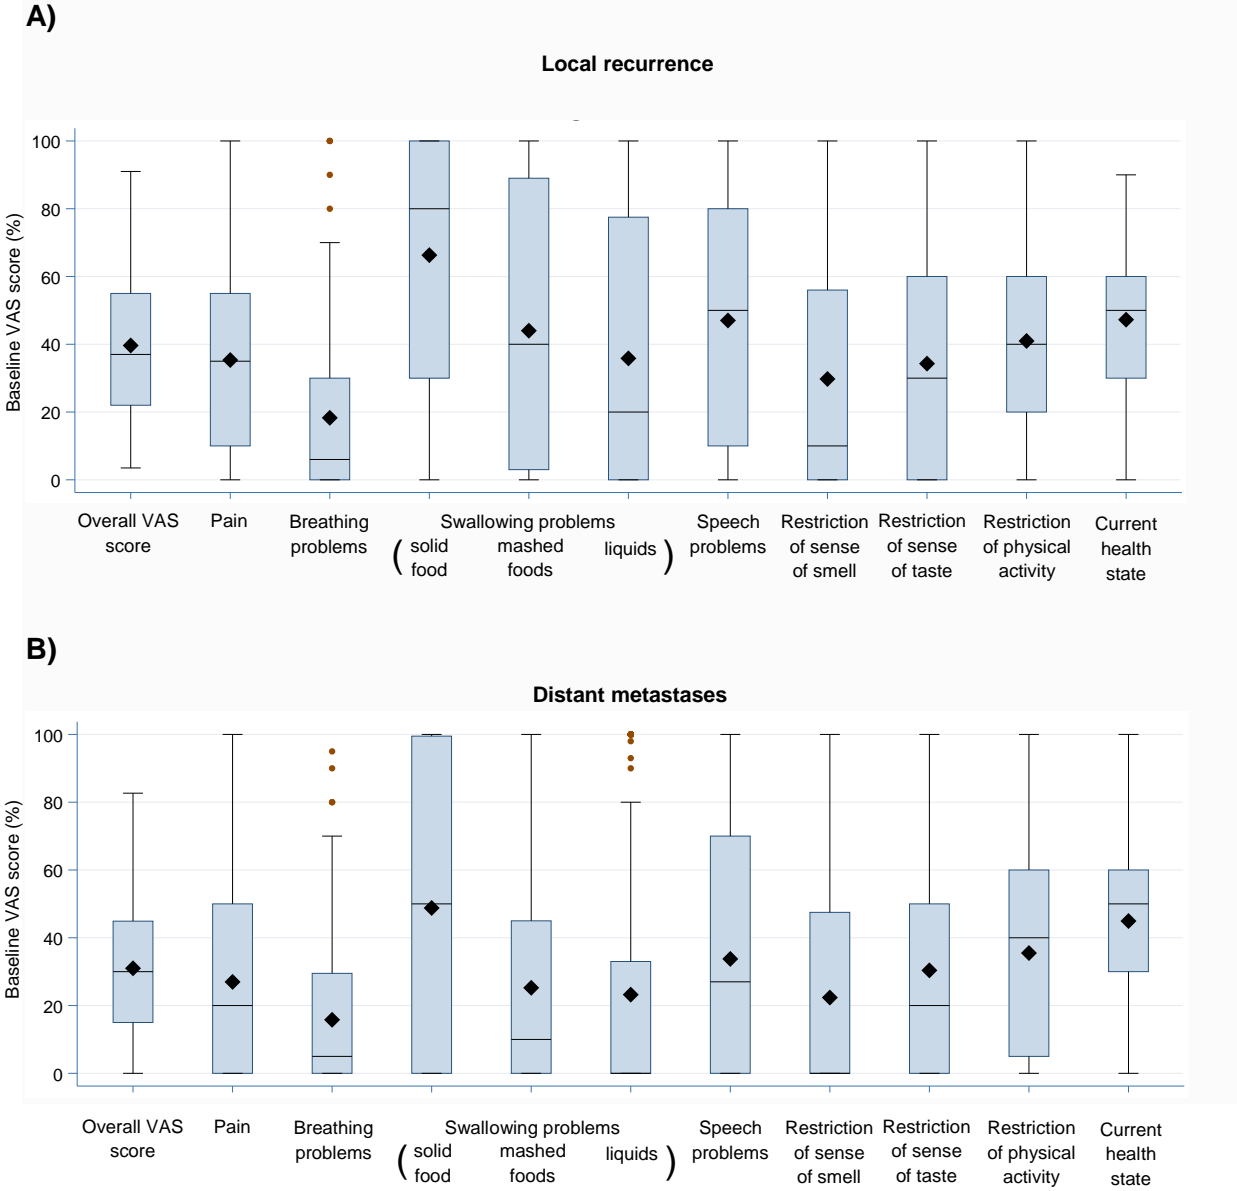

Baseline symptom burden of the mTAS patients separated in patients with locoregional recurrence without distant metastases (A) and patients with distant metastases or both (B). Values range from 0 – 100, higher values represent heavier symptoms. The point ♦ in the box indicates the mean and the horizontal lines the median.
