# Supplementary material for: Treatment response lowers tumor symptom burden in recurrent and/or metastatic head and neck cancer
Source: Springer Nature journal article supplement (doi:10.1186/s12885-020-07440-w), 2020-09-29
Supplement: MOESM4 [file 12885_2020_7440_MOESM4_ESM.pdf]

**Supplementary Figure S4:**

**Survival analyses according to the Kaplan-Meier Method.**

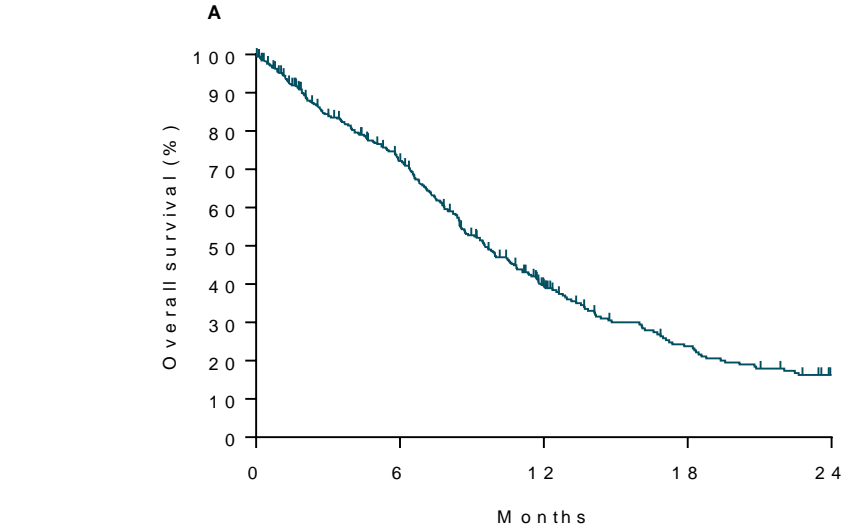

**Number at risk**

|                  |     |     |    |    |    |
|------------------|-----|-----|----|----|----|
| Total population | 389 | 228 | 98 | 45 | 19 |
|------------------|-----|-----|----|----|----|

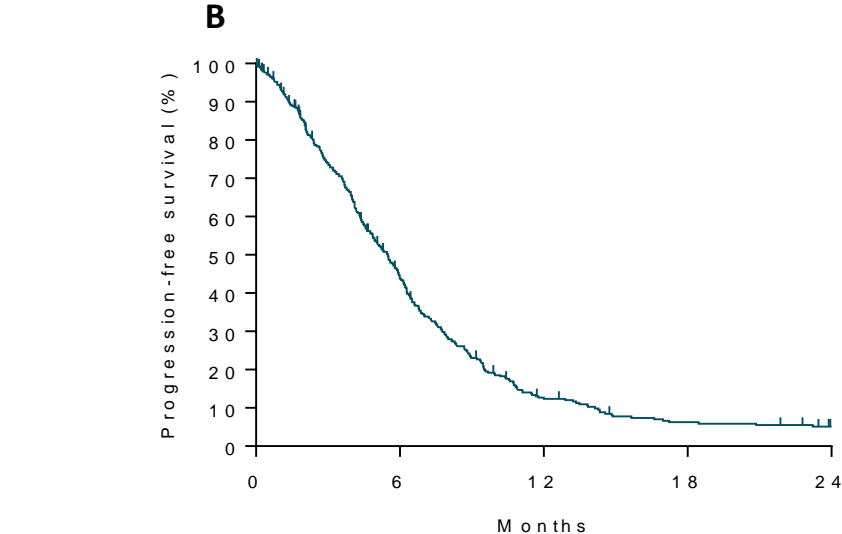

**Number at risk**

|                  |     |     |    |    |   |
|------------------|-----|-----|----|----|---|
| Total population | 388 | 142 | 38 | 17 | 7 |
|------------------|-----|-----|----|----|---|

Kaplan-Meier curves for overall survival (A) and progression-free survival (B) for all patients (TAS cohort). One patient was excluded from the PFS analysis due to missing follow up.
